# Supplementary material for: Development of highly sensitive optical nanoantenna for bacterial detection
Source: Royal Society of Chemistry journal article supplement (doi:10.1039/d2an00475e), 2022-01-01
Supplement: d2an00475e1.pdf [file d2an00475e1.pdf]

## Electronic Supplementary Information

# Development of Highly Sensitive Optical Nanoantenna for Bacterial Detection

Satohiro Itagaki,<sup>a</sup> So Tanabe,<sup>a</sup> Hikaru Ikeda,<sup>a</sup> Xueling Shan,<sup>b</sup> Shigeki Nishii,<sup>a</sup> Yojiro Yamamoto,<sup>a</sup> Yasuhiro Sadanaga,<sup>a</sup> Zhidong Chen,<sup>b</sup> and Hiroshi Shiigi<sup>\*ac</sup>

<sup>a</sup> Department of Applied Chemistry, Osaka Prefecture University, 1-1 Gakuen, Naka, Sakai, Osaka 599-8531, Japan.

<sup>b</sup> Jiangsu Key Laboratory of Advanced Catalytic Materials and Technology, School of Petrochemical Engineering, Changzhou University, Changzhou 213164, China.

<sup>c</sup> Osaka International Research Center for Infectious Diseases, 1-2 Gakuen, Naka, Sakai, Osaka 599-8570, Japan.

### Table of contents

Fig. S1

Fig. S2

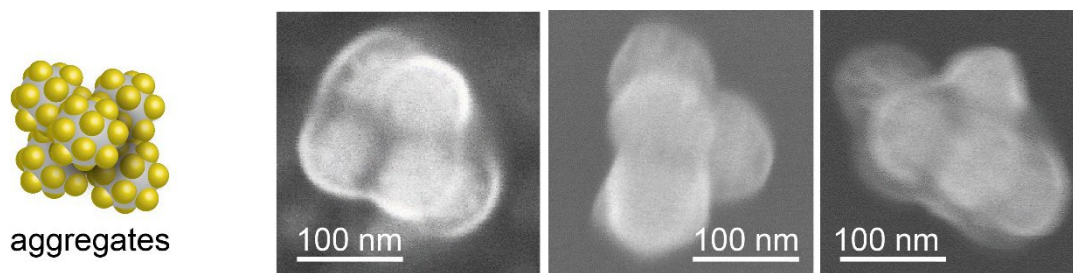

**Fig. S1** FE-SEM images of differently shaped aggregates of AuNS after the reaction with GA for 4 h.

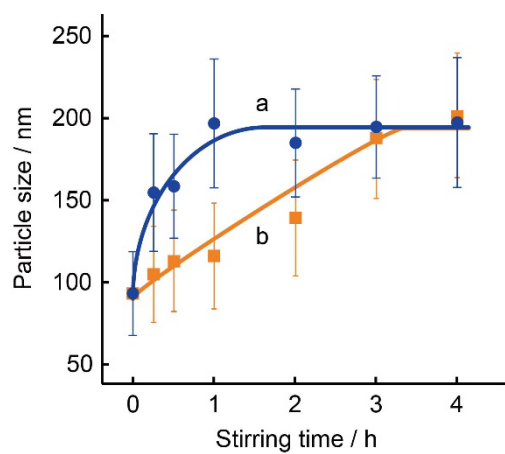

**Fig. S2** Relationship between the particle size of AuNS aggregates and the reaction time for cross-linking. The amount of 2.8M GA solution added to the AuNS suspension: (a) 2.0 mL and (b) 0.40 mL.
